# Supplementary material
Source: PubMed Central journal article supplement (PMC4367804)
Supplement: jvin-197-687-1vim.pdf [file jvin-197-687-1vim.pdf]

**Instructions:**

1. *Separate form should be filled in for each subject*
2. *Introduce yourself and explain the purpose of your interview*
3. *Verbal consent should be obtained from the respondent before the interview*
4. *Determine stroke free status by completing Section I prior to completing the rest of the form*

| S.No.  | Stroke Symptom Questionnaire                                                               | Code List                                | Code |
|--------|--------------------------------------------------------------------------------------------|------------------------------------------|------|
| 1.1    | Were you ever told by a physician that you had a stroke?                                   | Yes.....1<br>No.....2<br>Don't Know....0 |      |
| 1.2    | Were you ever told by a physician that you had a mini stroke or transient ischemic attack? | Yes.....1<br>No.....2<br>Don't Know....0 |      |
| 1.3 a) | Have you ever had a sudden painless weakness on one side of your body?                     | Yes.....1<br>No.....2<br>Don't Know....0 |      |
| 1.3 b) | If Yes, which side                                                                         | Rt.....1<br>Lt.....0                     |      |
|        | Duration                                                                                   |                                          |      |
| 1.4 a) | Have you ever had a sudden numbness or dead feeling on one side of your body?              | Yes.....1<br>No.....2<br>Don't Know....0 |      |
| 1.4 b) | If Yes, which side                                                                         | Rt.....1<br>Lt.....0                     |      |
|        | Duration                                                                                   |                                          |      |
| 1.5 a) | Have you ever had a sudden painless loss of vision in one or both of your eyes?            | Yes.....1<br>No.....2<br>Don't Know....0 |      |
| 1.5 b) | If Yes, which side                                                                         | Rt.....1<br>Lt.....0                     |      |
|        | Duration                                                                                   |                                          |      |
| 1.6    | Have you ever suddenly lost the ability to understand what people are saying?              | Yes.....1<br>No.....2<br>Don't Know....0 |      |
| 1.7    | Have you ever suddenly lost the ability to express yourself verbally or in writing?        | Yes.....1<br>No.....2<br>Don't Know....0 |      |

## Questionnaire Clinical and Lifestyle Determinants of Asymptomatic Intracranial Atherosclerotic Disease in Asymptomatic Adults Undergoing MRI at Two Tertiary Care Centres in Karachi

Patient's (optional): \_\_\_\_\_ name \_\_\_\_\_ E-mail (optional): \_\_\_\_\_

MR #/ S.No: \_\_\_\_\_ Indication \_\_\_\_\_ for \_\_\_\_\_ the \_\_\_\_\_ test: \_\_\_\_\_

Patient's address: \_\_\_\_\_

City, \_\_\_\_\_ state, \_\_\_\_\_ postal code: \_\_\_\_\_

Telephone # \_\_\_\_\_ Res: \_\_\_\_\_

Cell: \_\_\_\_\_ Off: \_\_\_\_\_

### Section I: Stroke Free Status Assessment

### Section II: Demographics and Socioeconomic Status

| S.No.   |                                                     |                                                                                                                                                                                                                                                                                                                                                                                                                                                                                                                                                                                                                                                                                  |
|---------|-----------------------------------------------------|----------------------------------------------------------------------------------------------------------------------------------------------------------------------------------------------------------------------------------------------------------------------------------------------------------------------------------------------------------------------------------------------------------------------------------------------------------------------------------------------------------------------------------------------------------------------------------------------------------------------------------------------------------------------------------|
| 2.1     | This questionnaire is being answered by             | Self: _____ Other (specify): _____                                                                                                                                                                                                                                                                                                                                                                                                                                                                                                                                                                                                                                               |
| 2.2     | Date of Enrolment:                                  | _____ (dd)/ _____ (m)/ _____ (yy)                                                                                                                                                                                                                                                                                                                                                                                                                                                                                                                                                                                                                                                |
| 2.3     | Date of birth                                       | _____ (dd) _____ (m) _____ (yy)                                                                                                                                                                                                                                                                                                                                                                                                                                                                                                                                                                                                                                                  |
| 2.4     | Age (in yrs)                                        |                                                                                                                                                                                                                                                                                                                                                                                                                                                                                                                                                                                                                                                                                  |
| 2.5     | Gender                                              | Male <input type="checkbox"/> Female <input type="checkbox"/>                                                                                                                                                                                                                                                                                                                                                                                                                                                                                                                                                                                                                    |
| 2.6     | Are you a Pakistani national?                       | Yes...1, No.....0                                                                                                                                                                                                                                                                                                                                                                                                                                                                                                                                                                                                                                                                |
| 2.7     | Years of residence in Pakistan                      |                                                                                                                                                                                                                                                                                                                                                                                                                                                                                                                                                                                                                                                                                  |
| 2.8     | Ethnicity                                           | Sindhi <input type="checkbox"/> Pathan <input type="checkbox"/> Punjabi <input type="checkbox"/> Balochi <input type="checkbox"/> Other (specify) _____                                                                                                                                                                                                                                                                                                                                                                                                                                                                                                                          |
| 2.9     | Education                                           | Illiterate <input type="checkbox"/> Madrassa <input type="checkbox"/> Primary <input type="checkbox"/> Secondary <input type="checkbox"/> Graduate and above <input type="checkbox"/>                                                                                                                                                                                                                                                                                                                                                                                                                                                                                            |
| 2.10    | Marital status                                      | Single <input type="checkbox"/> Married <input type="checkbox"/> Divorced <input type="checkbox"/> Widowed <input type="checkbox"/>                                                                                                                                                                                                                                                                                                                                                                                                                                                                                                                                              |
| 2.11    | Socio-economic status:                              |                                                                                                                                                                                                                                                                                                                                                                                                                                                                                                                                                                                                                                                                                  |
| 2.11 a) | Monthly family income                               | <5000 <input type="checkbox"/> 5000–10,000 <input type="checkbox"/> 10,000–20,000 <input type="checkbox"/> 20,000–30,000 <input type="checkbox"/> >30,000                                                                                                                                                                                                                                                                                                                                                                                                                                                                                                                        |
| 2.11 b) | How many house-hold members are there in the house? | ≤ 4 <input type="checkbox"/> 4–5 <input type="checkbox"/> 6–7 <input type="checkbox"/> 7–8 <input type="checkbox"/> > 8 <input type="checkbox"/>                                                                                                                                                                                                                                                                                                                                                                                                                                                                                                                                 |
| 2.11 c) | Occupation:                                         | Employed <input type="checkbox"/> Unemployed <input type="checkbox"/> Retired <input type="checkbox"/> Housewife <input type="checkbox"/> Labourer/farmer <input type="checkbox"/> Daily wager <input type="checkbox"/> other (specify) _____                                                                                                                                                                                                                                                                                                                                                                                                                                    |
| 2.11 d) | Household Assets                                    | Washing machine <input type="checkbox"/> Colour TV <input type="checkbox"/> Cable TV <input type="checkbox"/> LCD <input type="checkbox"/> Refrigerator <input type="checkbox"/> Tape recorder <input type="checkbox"/> Microwave <input type="checkbox"/> Freezer <input type="checkbox"/> CD Player <input type="checkbox"/> Sewing machine <input type="checkbox"/> Car <input type="checkbox"/> Personal Computer <input type="checkbox"/> Bicycle <input type="checkbox"/> Motor bike <input type="checkbox"/> Mobile phone <input type="checkbox"/> Cooking ware <input type="checkbox"/> Property <input type="checkbox"/> Air conditioner/split <input type="checkbox"/> |
| 2.11 e) | Model of vehicle (s)                                | Old <input type="checkbox"/> New <input type="checkbox"/>                                                                                                                                                                                                                                                                                                                                                                                                                                                                                                                                                                                                                        |
| 2.11 f) | Land ownership (if any)                             | 0 = None <input type="checkbox"/> 1 = <1 acre <input type="checkbox"/> 2 = between 1 and 10 acres <input type="checkbox"/> 3 = >10 acres <input type="checkbox"/>                                                                                                                                                                                                                                                                                                                                                                                                                                                                                                                |

| S.No.  | Risk Factors                                                       | Code List                                 | Code |
|--------|--------------------------------------------------------------------|-------------------------------------------|------|
| 3.1a)  | Are you diabetic?                                                  | Yes...1, No.....2<br>Don't Know.....0     |      |
| 3.1b)  | If Yes, Duration of Diabetes?                                      | Yes...1, No.....0                         |      |
| 3.1 c) | If Yes, Are you on any medications for diabetes?<br>Compliant      | Yes...1, No.....0<br>Yes...1, No.....0    |      |
| 3.2    | Are you hypertensive?                                              | Yes.....1<br>No.....2<br>Don't Know.....0 |      |
| 3.3    | Have you ever had your blood pressure checked?                     | Yes...1, No.....0                         |      |
| 3.4    | If Yes, What were the readings on the last visit? _____            |                                           |      |
| 3.5    | Are you on any blood pressure lowering medications?Compliance      | Yes...1, No.....0<br>Yes...1, No.....0    |      |
| 3.6    | Do you have dyslipidemia/ raised cholesterol?                      | Yes.....1<br>No.....2<br>Don't Know.....0 |      |
| 3.7    | If yes, Are you on any medications for dyslipidemia?<br>Compliance | Yes...1, No.....0<br>Yes...1, No.....0    |      |
| 3.8    | Have you ever had a heart attack?                                  | Yes...1, No.....0                         |      |
| 3.9    | Have you ever had any pain or discomfort in your chest?            | Yes...1, No.....0                         |      |
| 3.10   | Have you had CABG or angioplasty done in the past?                 | Yes...1, No.....0                         |      |
| 3.11   | Have you ever had an irregular heart rhythm?                       | Yes...1, No.....0                         |      |
| 3.12   | Have you ever had rheumatic fever?                                 | Yes...1, No.....0                         |      |
| 3.13   | Have you ever had valvular heart disease?                          | Yes...1, No.....0                         |      |
| 3.14   | Have you ever had a valve replacement surgery?                     | Yes.....1<br>No.....2<br>Don't Know.....0 |      |
| 3.15   | Do you have a family history of ICAD or stroke?                    | Yes.....1<br>No.....2<br>Don't Know.....0 |      |

### Section III: Risk Factor

#### Assessment:

### Section IV: Tobacco Use Assessment (WHO STEPS Questionnaire)

### Section V: Physical Activity

#### Assessment by the International Physical Activity Questionnaire (IPAQ):

READ: Now, think about all the *vigorous* activities which take *hard physical effort* that you did in the last 7 days. Vigorous activities make you breathe much harder than normal and may include heavy lifting, digging, or floor mopping. Think only about those physical activities that you did for at least 10 minutes at a time.

| S.No. | Tobacco use                                                                                                                                         | Code List                                                                                           | Code |
|-------|-----------------------------------------------------------------------------------------------------------------------------------------------------|-----------------------------------------------------------------------------------------------------|------|
| 4.1   | Do you currently smoke any tobacco products, such as cigarettes, cigars or pipes?                                                                   | Yes...1, No.....0<br>If <i>No</i> go to ques. 4.5                                                   |      |
| 4.2   | Do you currently smoke tobacco products <b>daily</b> ?                                                                                              | Yes...1, No.....0                                                                                   |      |
| 4.3   | How old were you when you <b>first started</b> smoking daily?                                                                                       | Age (years) _____                                                                                   |      |
| 4.4   | <b>Which of</b> the following do you smoke each day?                                                                                                | Manufactured cigarettes<br>- Pipes full of tobacco<br>- Cheroots<br>- Bhiri<br>- others (specify)   |      |
| 4.5   | On average, <b>how many</b> of the following do you smoke each day?                                                                                 | - Manufactured cigarettes<br>- Pipes full of tobacco<br>- Cheroots<br>- Bhiri<br>- others (specify) |      |
| 4.6   | In the past, did you ever smoke daily?                                                                                                              | Yes...1, No.....0<br>If <i>No</i> go to ques.4.7                                                    |      |
| 4.7   | How old were you when you stopped smoking daily?                                                                                                    | Age (years) _____                                                                                   |      |
| 4.8   | Do you <b>currently</b> use any <b>smokeless tobacco</b> such as (snuff, chewing tobacco)?                                                          | Yes...1, No.....0<br>If <i>No</i> go to ques. 4.10                                                  |      |
| 4.9   | Do you <b>currently</b> use smokeless tobacco products <b>daily</b> ?                                                                               | Yes...1, No.....0<br>If <i>No</i> go to ques. 4.10                                                  |      |
| 4.10  | On average, how many times a day do you use?                                                                                                        | Yes...1, No.....0                                                                                   |      |
| 4.11  | In the <b>past</b> , did you ever use <b>smokeless tobacco</b> ?                                                                                    | Yes...1, No.....0                                                                                   |      |
| 4.12  | During the past 7 days, on how many days did someone in your home smoke when you were present?                                                      | No. of days: _____<br>Don't know ??                                                                 |      |
| 4.13  | During the past 7 days, on how many days did someone smoke in your workplace (in the building, work area or specific office) when you were present? | No of days: _____<br>Don't know or don't work in a closed area ??                                   |      |

| S.No                                                                                                                                                                                                                                                                                                                                                                                            | Physical activity                                                                                       | Code List                                                                                            | Code |
|-------------------------------------------------------------------------------------------------------------------------------------------------------------------------------------------------------------------------------------------------------------------------------------------------------------------------------------------------------------------------------------------------|---------------------------------------------------------------------------------------------------------|------------------------------------------------------------------------------------------------------|------|
| 5.1                                                                                                                                                                                                                                                                                                                                                                                             | During the last 7 days, on how many days did you do vigorous physical activities?                       | _____ Days/week (0-7 = 1, 8-9 = 0)<br>Don't Know/Not Sure 8<br>Refused 9                             |      |
| <i>If the respondent answers zero, refuses or does not know go to ques. 5.3</i>                                                                                                                                                                                                                                                                                                                 |                                                                                                         |                                                                                                      |      |
| 5.2                                                                                                                                                                                                                                                                                                                                                                                             | How much time did you usually spend doing <b>vigorous</b> physical activities on one of those days?     | _____ Hours/Day<br>(0-5 = 0, 6-10 = 1, 11-15 = 2, >15 = 3)<br>Don't Know/Not Sure 998<br>Refused 999 |      |
| Now think about activities which take <b>moderate physical effort</b> that you did in the last 7 days. Moderate physical activities make you breathe somewhat harder than normal and may include carrying light loads, washing clothes with hands or climbing stairs. Do not include walking. Again, think about only those physical activities that you did for at least 10 minutes at a time. |                                                                                                         |                                                                                                      |      |
| 5.3                                                                                                                                                                                                                                                                                                                                                                                             | During the <b>last 7 days</b> , on how many days did you do <b>moderate</b> physical activities?        | _____ Days per week<br>(0-7 = 1, 8-9 = 0)<br>Don't Know/Not Sure 8<br>Refused 9                      |      |
| <i>If the respondent answers zero, refuses or does not know go to ques. 5.5</i>                                                                                                                                                                                                                                                                                                                 |                                                                                                         |                                                                                                      |      |
| 5.4                                                                                                                                                                                                                                                                                                                                                                                             | How much time did you usually spend doing moderate physical activities on one of those days?            | _____ Hours/Day<br>(0-5 = 0, 6-10 = 1, 11-15 = 2, >15 = 3)<br>Don't Know/Not Sure 998<br>Refused 999 |      |
| Now think about the time you spent <b>walking</b> in the last 7 days. This includes at work and at home, walking to travel from place to place, and any other walking that you might do solely for recreation, sport, exercise, or leisure.                                                                                                                                                     |                                                                                                         |                                                                                                      |      |
| 5.5                                                                                                                                                                                                                                                                                                                                                                                             | During the <b>last 7 days</b> , on how many days did you <b>walk</b> for at least 10 minutes at a time? | _____ Days/week<br>(0-7 = 1, 8-9 = 0)<br>Don't Know/Not Sure 8<br>Refused 9                          |      |
| <i>If respondent answers zero, refuses or does not know, skip to Question 5.7</i>                                                                                                                                                                                                                                                                                                               |                                                                                                         |                                                                                                      |      |
| 5.6                                                                                                                                                                                                                                                                                                                                                                                             | How much time did you usually spend <b>walking</b> on one of those days?                                | _____ Hours/Day<br>(0-5 = 0, 6-10 = 1, 11-15 = 2, >15 = 3)<br>Don't Know/Not Sure 998<br>Refused 999 |      |
| Now think about the time you spent <b>sitting</b> on week days during the last 7 days. Include time spent at work, at home, while doing course work, and during leisure time. This may include time spent sitting at a desk, visiting friends, reading or sitting or lying down to watch television                                                                                             |                                                                                                         |                                                                                                      |      |
| 5.7                                                                                                                                                                                                                                                                                                                                                                                             | ? (Include time spent lying down (awake) as well as sitting]                                            | _____ Hours/Day<br>(0-5 = 0, 6-10 = 1, 11-15 = 2, >15 = 3)<br>Don't Know/Not Sure 998<br>Refused 999 |      |

| Staples                                   | Medium Serving | How often?                                                             |   |   |   |
|-------------------------------------------|----------------|------------------------------------------------------------------------|---|---|---|
|                                           |                | No. of times per:<br>D = Day, W = week,<br>M = Month, N = Rarely/Never |   |   |   |
| <b>BREADS</b>                             |                | D                                                                      | W | M | N |
| Chappati/roti with fat*                   | 1 chappati     |                                                                        |   |   |   |
| Chappati /roti without fat                | 1 chappati     |                                                                        |   |   |   |
| White bread                               | 1 slice        |                                                                        |   |   |   |
| Wholemeal bread                           | 1 slice        |                                                                        |   |   |   |
| Naan                                      | 1 naan         |                                                                        |   |   |   |
| Paratha                                   | 1 paratha      |                                                                        |   |   |   |
| Puri                                      | 1 puri         |                                                                        |   |   |   |
| Bajrarotla                                | 1 rotla        |                                                                        |   |   |   |
| <b>CEREALS</b>                            |                | D                                                                      | W | M | N |
| Low fiber/sugared cereals e.g. cornflakes | 1 bowl         |                                                                        |   |   |   |
| High fiber cereals e.g. weatabix          | 1 bowl         |                                                                        |   |   |   |
| Dhuri (porridge) / Dariya                 | 1 bowl         |                                                                        |   |   |   |
| Sweetbreads e.g. pancakes, muffins        | 1 sweetbread   |                                                                        |   |   |   |
| <b>DAIRY PRODUCTS</b>                     |                |                                                                        |   |   |   |
| Butter/Makkhan/Margarine                  | 1 tsp          |                                                                        |   |   |   |
| Whole Milk                                | 1 glass        |                                                                        |   |   |   |
| Skimmed milk                              | 1 glass        |                                                                        |   |   |   |
| Cream                                     | 1 tsp          |                                                                        |   |   |   |
| Cheese                                    | 1 slice/ cube  |                                                                        |   |   |   |
| Eggs (as white or whole )                 | 1              |                                                                        |   |   |   |
| Lassi                                     | 1 glass        |                                                                        |   |   |   |
| Curd                                      | ½ cup          |                                                                        |   |   |   |
| <b>RICE</b>                               |                | D                                                                      | W | M | N |
| Rice-white boiled only                    | 1 serv         |                                                                        |   |   |   |
| Rice-white cooked with oil                | 1 serv         |                                                                        |   |   |   |
| Vegetable Pulao/Tehri                     | 1 serv         |                                                                        |   |   |   |
| Meat Pulao/ Ukni                          | 1 serv         |                                                                        |   |   |   |
| Meat Biryani                              | 1 serv         |                                                                        |   |   |   |
| Khicheri (rice& lentils)                  | 1 serv         |                                                                        |   |   |   |
| Dossa                                     | 1 serv         |                                                                        |   |   |   |
| Noodles(Chinese)                          | 1 serv         |                                                                        |   |   |   |

| LENTILS, PULSES, DaaLS       | Medium Serving | How often?                                                               |   |   |   |
|------------------------------|----------------|--------------------------------------------------------------------------|---|---|---|
|                              |                | No. of times per:<br>D = Day, W = week,<br>M = Month, N = Rarely / Never |   |   |   |
|                              |                | D                                                                        | W | M | N |
| Masoor dhal (red lentil)     | 1 serv         |                                                                          |   |   |   |
| Channa dhal (split peas)     | 1 serv         |                                                                          |   |   |   |
| Mung dhal (green lentil)     | 1 serv         |                                                                          |   |   |   |
| Pakoray, other basenproducts | 1 serv         |                                                                          |   |   |   |

## Section VI: Dietary Assessment through Food Frequency Questionnaire (FFQ)

I am going to ask you what you normally eat. Please estimate the no. of times you have eaten the following foods on average in the last year.

### Section 1: Staples

### Section 2: Lentils, pulses, daals

### Section 3: Meat and Fish

## Section 4: Fruits & Salads

## Section 5: Confectionaries/Bakery Items

## Section VII: SRQ Scale for Anxiety and Depression

In the past four weeks:

## Section VIII: GENERAL PHYSICAL EXAMINATION

Tables

| MEAT AND FISH                                   | Medium Serving | How often?<br>No. of times per: |   |   |   |
|-------------------------------------------------|----------------|---------------------------------|---|---|---|
|                                                 |                | D                               | W | M | N |
| <b>SNACKS</b>                                   |                |                                 |   |   |   |
| Burger / McDonalds                              | 1 burger       |                                 |   |   |   |
| (Kentucky) Fried Chicken                        | 1 serv         |                                 |   |   |   |
| Kebab                                           | 1 kebab        |                                 |   |   |   |
| Meat Samosa                                     | 1 samosa       |                                 |   |   |   |
| Lasagne                                         | 1 serv         |                                 |   |   |   |
| Pizza                                           | 1 piece        |                                 |   |   |   |
| <b>ROAST/ GRILLED / BBQ</b>                     |                |                                 |   |   |   |
| Chicken/ Tikka                                  | 1 serv         |                                 |   |   |   |
| Lamb / Chops                                    | 1 serv         |                                 |   |   |   |
| Beaf/ Steak                                     | 1 serv         |                                 |   |   |   |
| <b>CURRIES</b>                                  |                |                                 |   |   |   |
| Chicken & potato or other veg                   | 1 serv         |                                 |   |   |   |
| Chicken alone/Karai/Bhunna                      | 1 serv         |                                 |   |   |   |
| Meat & potato/Aloo Ghost                        | 1 serv         |                                 |   |   |   |
| Meat alone-lamb,mutton, beaf,chops/Karai/Bhunna | 1 serv         |                                 |   |   |   |
| Ghost palak/meat & other veg                    | 1 serv         |                                 |   |   |   |
| Kofta                                           | 1 serv         |                                 |   |   |   |
| Keema                                           | 1 serv         |                                 |   |   |   |
| AlooKeema                                       | 1 serv         |                                 |   |   |   |
| Keemamatar                                      | 1 serv         |                                 |   |   |   |
| <b>FISH DISHES</b>                              |                |                                 |   |   |   |
| Masala fried fish                               | 1 serv         |                                 |   |   |   |
| Fried fish with batter, as in fish and chips    | 1 serv         |                                 |   |   |   |
| Fish fingers                                    | 1 serv         |                                 |   |   |   |
| Other white fish—fresh or frozen                | 1 serv         |                                 |   |   |   |
| Shell fish, e.g., crab, prawns                  | 1 serv         |                                 |   |   |   |

|                                                            |                       | D        | W        | M        | N        |
|------------------------------------------------------------|-----------------------|----------|----------|----------|----------|
| Fresh fruit/s                                              | Y / N                 |          |          |          |          |
| <b>If yes, What kind of fruit? How much?</b>               | <b>Medium serving</b> | <b>D</b> | <b>W</b> | <b>M</b> | <b>N</b> |
| <i>Write 1 if you ate one apple, h/2 if you ate a half</i> |                       |          |          |          |          |
| Apple                                                      | _____ piece           |          |          |          |          |
| Banana                                                     | _____ piece           |          |          |          |          |
| Orange                                                     | _____ piece           |          |          |          |          |
| Melon                                                      | _____ slice           |          |          |          |          |
| Fruit salad                                                | _____ serv            |          |          |          |          |
| Other fruit ( specify)                                     | _____ piece/portion   |          |          |          |          |
| Fruit Juices                                               | _____ glass           |          |          |          |          |
| Vegetable/Green salad                                      | _____ serv            |          |          |          |          |
| Coleslaw                                                   | _____ serv            |          |          |          |          |

|                               | Medium serving | D | W | M | N |
|-------------------------------|----------------|---|---|---|---|
| Regular biscuits              |                |   |   |   |   |
| Low sugar biscuits            |                |   |   |   |   |
| Cake/Brownie/Pastry/Doughnuts | 1 slice        |   |   |   |   |
| Chocolates                    | 1 bar          |   |   |   |   |
| Ice-cream                     | 1 cup          |   |   |   |   |
| Crisps/Chips                  | 1 serv         |   |   |   |   |
| French fries                  | 1 serv         |   |   |   |   |

| S.No. | SRQ Scale                                                    | Code List         | Code |
|-------|--------------------------------------------------------------|-------------------|------|
| 7.1   | Do you often have headaches?                                 | Yes...1, No.....0 |      |
| 7.2   | Is your appetite poor?                                       | Yes...1, No.....0 |      |
| 7.3   | Do you sleep badly?                                          | Yes...1, No.....0 |      |
| 7.4   | Are you easily frightened?                                   | Yes...1, No.....0 |      |
| 7.5   | Do your hands shake?                                         | Yes...1, No.....0 |      |
| 7.6   | Do you feel nervous, tense or worried?                       | Yes...1, No.....0 |      |
| 7.7.8 | Is your digestion poor?Do you have trouble thinking clearly? | Yes...1, No.....0 |      |
| 7.9   | Do you feel unhappy?                                         | Yes...1, No.....0 |      |
| 7.10  | Do you cry more than usual?                                  | Yes...1, No.....0 |      |
| 7.11  | Do you find it difficult to enjoy your daily activities?     | Yes...1, No.....0 |      |
| 7.12  | Do you find it difficult to make decisions?                  | Yes...1, No.....0 |      |
| 7.13  | Is your daily work suffering?                                | Yes...1, No.....0 |      |
| 7.14  | Are you unable to play a useful part in life?                | Yes...1, No.....0 |      |
| 7.15  | Have you lost interest in things?                            | Yes...1, No.....0 |      |
| 7.16  | Do you feel that you are a worthless person?                 | Yes...1, No.....0 |      |
| 7.17  | Has the thought of ending your life been on your mind?       | Yes...1, No.....0 |      |
| 7.18  | Do you feel tired all the time?                              | Yes...1, No.....0 |      |
| 7.19  | Do you have uncomfortable feelings in your stomach?          | Yes...1, No.....0 |      |
| 7.20  | Are you easily tired?                                        | Yes...1, No.....0 |      |

---

Weight (kg):  
Height (cm)  
Waist (cm)  
BMI

---
