# Supplementary material
Source: PubMed Central journal article supplement (PMC4367804)
Supplement: jvin-197-688-1vim.pdf [file jvin-197-688-1vim.pdf]

| ARTERY             | No Stenosis | Stenosis | % of stenosis |        |         |         |
|--------------------|-------------|----------|---------------|--------|---------|---------|
|                    |             |          | <25%          | 25-49% | 50%-74% | 75%-99% |
| R ICA-petrous      |             |          |               |        |         |         |
| R ICA-cavernous    |             |          |               |        |         |         |
| R ICA-supraclinoid |             |          |               |        |         |         |
| L ICA-petrous      |             |          |               |        |         |         |
| L ICA-cavernous    |             |          |               |        |         |         |
| L ICA-supraclinoid |             |          |               |        |         |         |
| Right MCA M1       |             |          |               |        |         |         |
| Right MCA M2       |             |          |               |        |         |         |
| Right ACA A1       |             |          |               |        |         |         |
| Right ACA A2       |             |          |               |        |         |         |
| Left MCA M1        |             |          |               |        |         |         |
| Left MCA M2        |             |          |               |        |         |         |
| Left ACA A1        |             |          |               |        |         |         |
| Left ACA A2        |             |          |               |        |         |         |
| Right vertebral    |             |          |               |        |         |         |
| Left vertebral     |             |          |               |        |         |         |
| Basilar            |             |          |               |        |         |         |
| Right PCA          |             |          |               |        |         |         |
| Left PCA           |             |          |               |        |         |         |

## Dcf for Intracranial Stenosis

Scan ID.# /MR #: \_\_\_\_\_

severe stenosis, and  $D_{normal}$  = diameter of the proximal normal artery.

Date of Reading: \_\_\_\_\_

Scan quality: Good  Moderate  Poor

Is the scan completely normal? Y  N

**If yes, stop here.**

Is there any sign of acute ischemic change? Y  N

If in doubt, mark as acute.

Which side of the brain shows ischemic change? Rt Lt

### Angiography Data:

Percent stenosis =  $(1 - (D_{stenosis}/D_{normal})) \times 100$  where  $D_{stenosis}$  = diameter of the artery at the site of the most

*Indicate the vascular lesion(s) on the diagram below and label the area of stenosis with percent occlusion:*

Extend to show MCA1, MCA2 and the ICAs

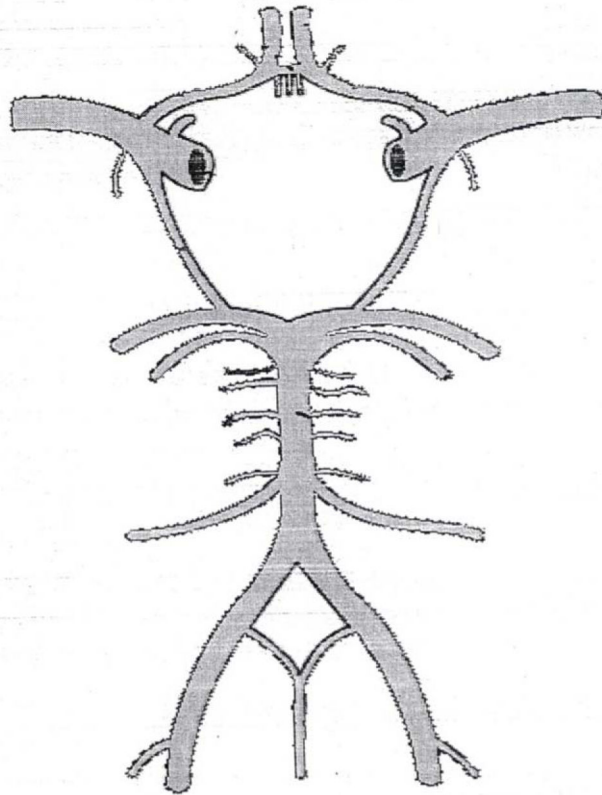

## Reduction in brain tissue volume

14. Is there any Reduction in brain tissue volume?  Y  N *If No go to Q.16*
15. Classify atrophy (see examples and pick nearest likeness):
- |     |                                                            |                          |                          |                          |
|-----|------------------------------------------------------------|--------------------------|--------------------------|--------------------------|
|     |                                                            | Y                        | N                        |                          |
|     |                                                            | <input type="checkbox"/> | <input type="checkbox"/> | <i>If No go to Q.16</i>  |
| 15. | Classify atrophy (see examples and pick nearest likeness): | None                     | Mod                      | Severe                   |
|     | central                                                    | <input type="checkbox"/> | <input type="checkbox"/> | <input type="checkbox"/> |
|     | cortical                                                   | <input type="checkbox"/> | <input type="checkbox"/> | <input type="checkbox"/> |

## CENTRAL reduction in brain tissue

None

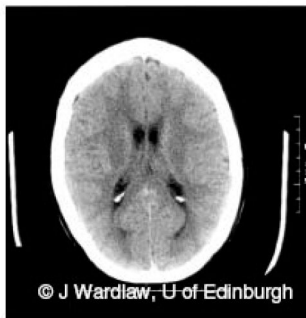

Modest

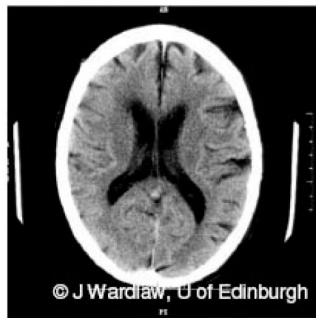

Severe

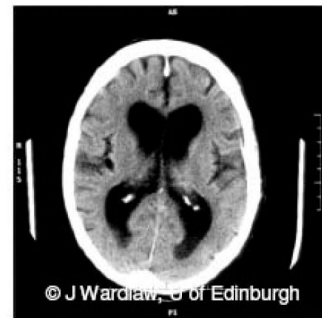

## CORTICAL reduction in brain tissue

None

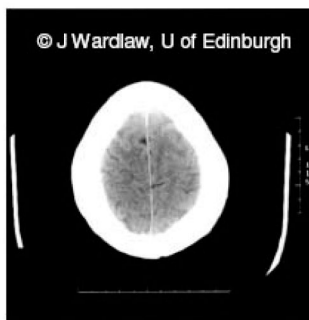

Mild

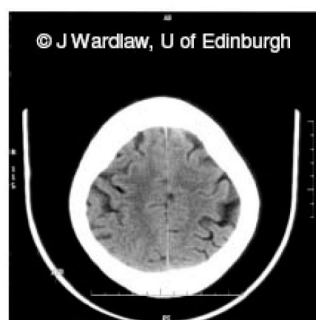

Severe

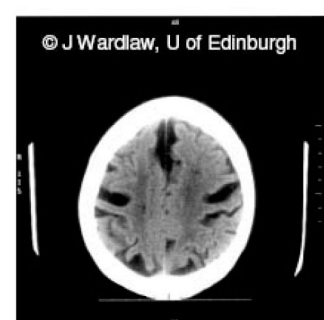

*Approach validated in  
Eur Radiol 2008;19:177-183*

**PERIVENTRICULAR LUCENCIES**

16. Are there any periventricular lucencies?

Y

N

*If No go to Q.18*

17. Classify extent of white matter lucency

a. Anterior white matter

- 0= no lucency
- 1= lucency restricted to region adjoining ventricles
- 2= lucency covering entire region from lateral ventricle to cortex

0,1,2

b. Posterior white matter

- 0= no lucency
- 1= lucency restricted to region adjoining ventricles
- 2= lucency covering entire region from lateral ventricle to cortex

0,1,2

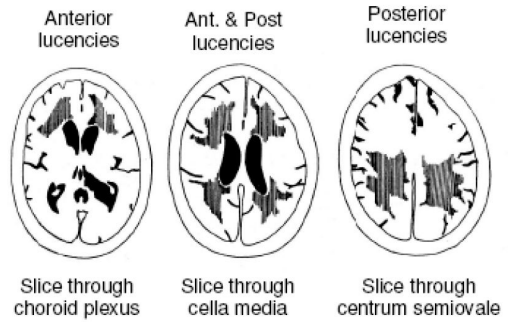

(diagrams from van Swieten et al. JNNP 1990;53:1080-1083)

**AWM = 1    PWM = 0**

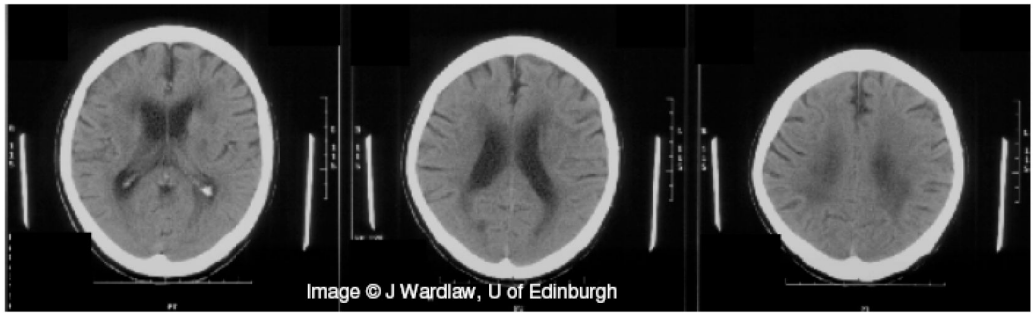

**AWM = 2    PWM = 1**

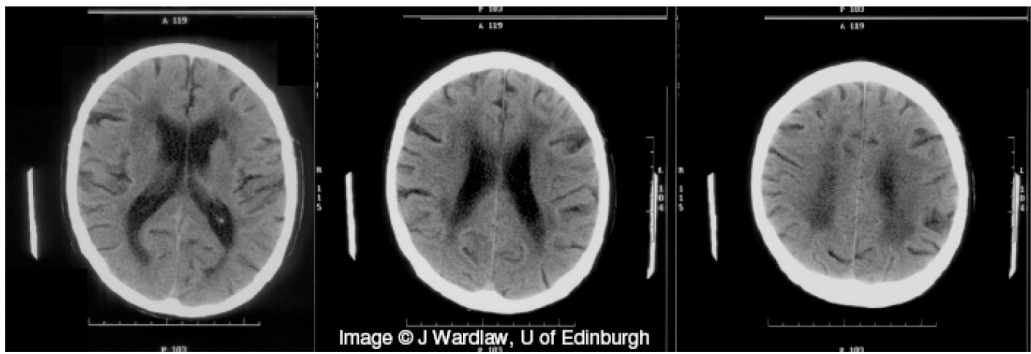

**OLD VASCULAR LESIONS**

18. Are there any old vascular lesions?  Y  N # No go to Q.20

19. Classify old vascular lesion(s):

|                                        | Y                        | N                        |
|----------------------------------------|--------------------------|--------------------------|
| a) old cortical infarct(s)             | <input type="checkbox"/> | <input type="checkbox"/> |
| b) old subcortical infarct(s)          | <input type="checkbox"/> | <input type="checkbox"/> |
| c) old lobar infarct(s)                | <input type="checkbox"/> | <input type="checkbox"/> |
| d) old lacunar infarct(s)              | <input type="checkbox"/> | <input type="checkbox"/> |
| e) old brainstem/cerebellar infarct(s) | <input type="checkbox"/> | <input type="checkbox"/> |
| f) probable old haemorrhage            | <input type="checkbox"/> | <input type="checkbox"/> |

**NON-STROKE LESIONS**

20. Is there a non-stroke lesion, which could have occurred for the patient's stroke syndrome?  Y  N # No go to Q.22

21. Classify non-stroke lesion:

|                           | Y                        | N                        |
|---------------------------|--------------------------|--------------------------|
| a) cerebral tumour        | <input type="checkbox"/> | <input type="checkbox"/> |
| b) encephalitis           | <input type="checkbox"/> | <input type="checkbox"/> |
| c) cerebral abscess       | <input type="checkbox"/> | <input type="checkbox"/> |
| d) other (e.g. contusion) | <input type="checkbox"/> | <input type="checkbox"/> |

Specify Other:

22. COMMENT:
